# Supplementary material
Source: PubMed Central journal article supplement (PMC2729153)
Supplement: jcem_jc.2007-1354_2.pdf [file jcem_jc.2007-1354_2.pdf]

**Supplementary Table 1:** Biochemical test results of Pheo-confirmed patients with a false-negative result for the combined plasma metanephrines and CGA assays (patients 1-5) and combined plasma fractionated metanephrines and urine fractionated metanephrines (patients 6-8).

| Patient No. | Plasma Met (nmol/L) | Plasma Normet (nmol/L) | Serum CGA (ng/mL) | Urine Met (µg/24h) | Urine Normet (µg/24h) |
|-------------|---------------------|------------------------|-------------------|--------------------|-----------------------|
| 1           | 0.27                | 1.8                    | <b>194</b>        | 291                | 1623                  |
| 2           | 2.68                | 11.3                   | <b>200</b>        | 3050               | 5551                  |
| 3           | <0.20               | 3.41                   | <b>161</b>        | 44                 | 1725                  |
| 4           | <0.20               | 1.33                   | <b>153</b>        | 140                | 794                   |
| 5           | <0.20               | 1.71                   | <b>141</b>        | 174                | 811                   |
| 6           | 0.34                | 1.10                   | 1050              | <b>284</b>         | <b>597</b>            |
| 7           | <0.20               | 1.23                   | 310               | <b>83</b>          | <b>297</b>            |
| 8           | 0.33                | 1.28                   | 3131              | <b>66</b>          | <b>440</b>            |

CGA, chromogranin A; Met, metanephrine; Normet, normetanephrine
